# Supplementary material for: A Homozygous Deletion of Exon 5 of KYNU Resulting from a Maternal Chromosome 2 Isodisomy (UPD2) Causes Catel-Manzke-Syndrome/VCRL Syndrome
Source: MDPI journal article supplement (doi:10.3390/genes12060879), 2021-06-07
Supplement: s1 [file s1]

**Supplementary Table S1 Known genetic causes of HLHS**

| Gene                                                                | Genomic location | Function                                                                                                                               | Literature                                                                           |
|---------------------------------------------------------------------|------------------|----------------------------------------------------------------------------------------------------------------------------------------|--------------------------------------------------------------------------------------|
| <b>HLHS without extracardiac involvement</b>                        |                  |                                                                                                                                        |                                                                                      |
| <b>NKX2-5</b>                                                       | 5q35.1           | Encodes for a homeobox-containing transcription factor important for tissue differentiation and development of the heart               | Stallmeyer et al., 2010 (4)                                                          |
| <b>HAND1</b>                                                        | 5q33.2           | Encodes for a basic helix-loop-helix transcription factor that is essential for mammalian heart development                            | Reamon-Buettner et al., 2008 (5).                                                    |
| <b>rbFOX2</b>                                                       | 22q12.3          | Encodes for a regulatory protein important for tissue-specific exon splicing in pre-mRNAs                                              | Homsy et al., 2015 (6)                                                               |
| <b>ERBB4</b>                                                        | 2q34             | Encodes a tyrosine protein kinase; required for muscle differentiation cardiomyocyte proliferation                                     | McBride et al., 2011 (7)                                                             |
| <b>GJA1</b>                                                         | 6q22.31          | Encodes for a protein that is a component of gap junctions in the heart                                                                | Dasgupta et al., 2001 (8)                                                            |
| <b>MYH6</b>                                                         | 14q11.2          | Encodes for a protein involved in myocyte contractility                                                                                | Theis et al., 2015 (9)                                                               |
| <b>TAB2</b>                                                         | 6q25.1           | Encodes for a protein that play a role in the development of the cardiovascular System                                                 | Cheng et al., 2020 (10)                                                              |
| <b>HLHS with additional extracardiac features</b>                   |                  |                                                                                                                                        |                                                                                      |
| <b>NOTCH1;</b><br>Aortic valve disease 1<br>Adams-Oliver syndrome 5 | 9q34.3           | Encodes the Notch 1 protein receptor, important for NOTCH signalling pathway                                                           | Iacone et al., 2012, (11)                                                            |
| <b>ETS1;</b> Jacobsen Syndrome                                      | 11q24.3          | Encodes for a transcription factor important for regulation of expression of genes controlling endothelial cell migration and invasion | Glessner et al., 2014 (12)                                                           |
| <b>TBX5;</b><br>CHM, some cases with<br>extracardiac manifestations | 12q24.1          | Encodes for a protein that is important for growth and development of the interventricular septum of the heart                         | Takeuchi et al, 2003 (13)                                                            |
| <b>FOXC2;</b><br>Lymphedema-distichiasis<br>syndrome                | 16q24.1          | Encodes a transcription factor involved in the development of the cardiovascular system                                                | Stankiewicz et al, 2009(14)                                                          |
| <b>HAAO;</b> VCRL2                                                  | 2p21             | Encodes for an enzyme involved in the de novo NAD(H) synthesis pathway                                                                 | Shi et al., 2017 (1)                                                                 |
| <b>KYNU;</b> VCRL1                                                  | 2q22.2           | Encodes for an enzyme involved in the de novo NAD(H) synthesis pathway                                                                 | Shi et al., 2017 (1)                                                                 |
| <b>NADSYN;</b> VCRL3                                                | 11q13.4          | Encodes for an enzyme involved in the de novo NAD(H) synthesis pathway                                                                 | Szot et al., 2020 (2)                                                                |
| <b>Chromosomal aberrations associated with HLHS</b>                 |                  |                                                                                                                                        |                                                                                      |
| <b>Monosomy X,</b> Turner Syndrome                                  |                  |                                                                                                                                        | Natowicz et al, 1988 (15)<br>Mazzanti et al, 1998 (16)<br>Loscalzo et al., 2005 (17) |
| <b>Trisomy 18;</b> Edward Syndrome                                  |                  |                                                                                                                                        | Natowicz et al, 1988 (15)<br>Ferencz et al., 1997 (18)                               |
| <b>Trisomy 13;</b> Patau Syndrome                                   |                  |                                                                                                                                        | Natowicz et al, 1988 (15)<br>Ferencz et al., 1997 (18)                               |
| <b>Terminal deletion 11q;</b> Jacobsen Syndrome                     |                  |                                                                                                                                        | Grossfeld et al., 2004 (19)                                                          |
| <b>Terminal deletion 15q26;</b>                                     |                  |                                                                                                                                        | Lalani et al., 2013 (20)                                                             |
| <b>Terminal deletion 21q22.3</b>                                    |                  |                                                                                                                                        | Ciocca et al., 2015 (21)                                                             |

**Supplementary Table S1**

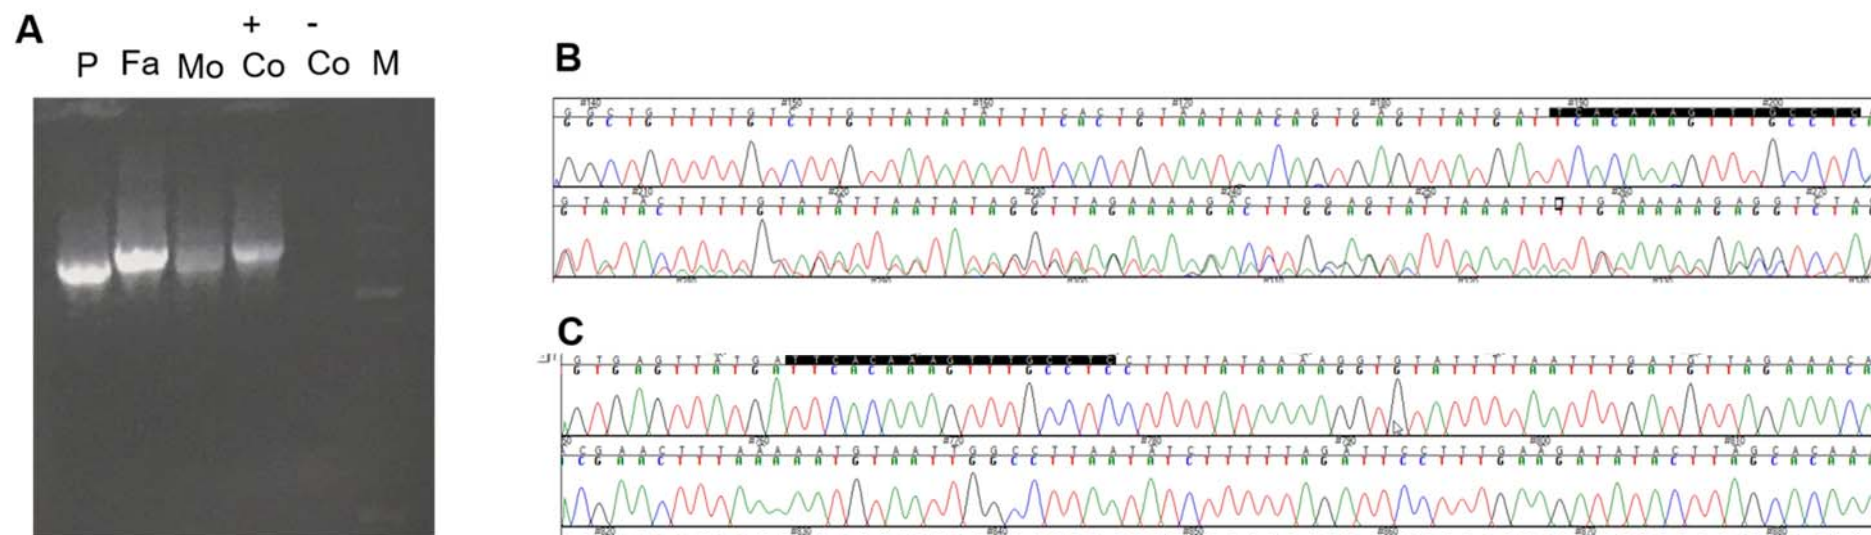

**Supplementary Figure S1. Breakpoint analysis using Sanger sequencing.** (A) Gel electrophoresis of long-range PCR products of the affected child (P), the father (fa), the mother (mo) positive control (control DNA, Co) and negative control (water, Co -) and marker (M) shows an approximately 1 kb smaller product in the patient as well as the mother compared to father and control. (B) Sanger analysis of the long range product shows the 5' breakpoint in the mother heterozygously (double peaks) while wildtyp sequence is detected at this position in the father (C).

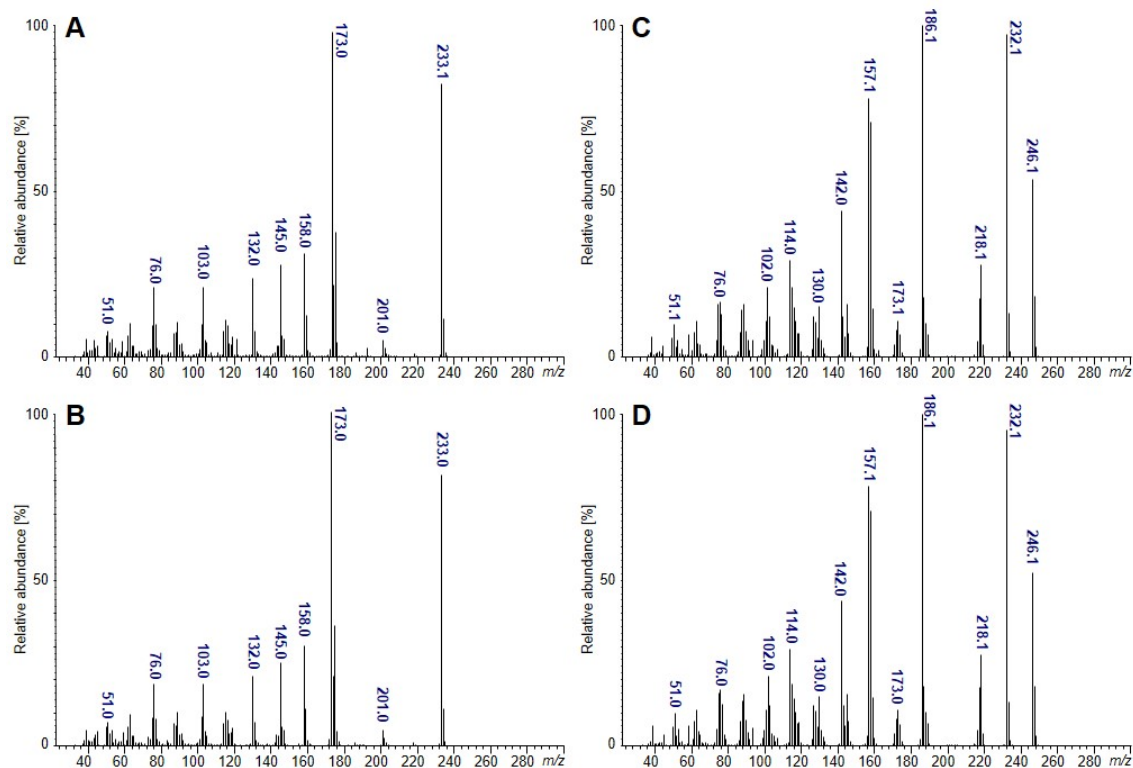

**Supplementary Figure S2. Xanthurenic acid chemical reference standard.** Full scan positive electron ionization mass spectra of A) signal at 48.2 min in chromatogram A (Figure 3), B) signal at 48.2 min of the methylated Xanthurenic acid chemical reference standard (presumably the di-methylated product), C) signal at 52.4 min in chromatogram A (Figure 3), and D) signal at 52.4 min of the methylated Xanthurenic acid chemical reference standard (presumably the tri-methylated product).
